# Supplementary material for: IL-25 Could Be Involved in the Development of Allergic Rhinitis Sensitized to House Dust Mite
Source: Hindawi journal article supplement (doi:10.1155/2017/3908049), 2017-01-01

**Supplementary Fig. 1.** The expression of IL-33 and TSLP mRNA in nasal tissues from control, non-allergic rhinitis, and house dust mite sensitized allergic rhinitis.

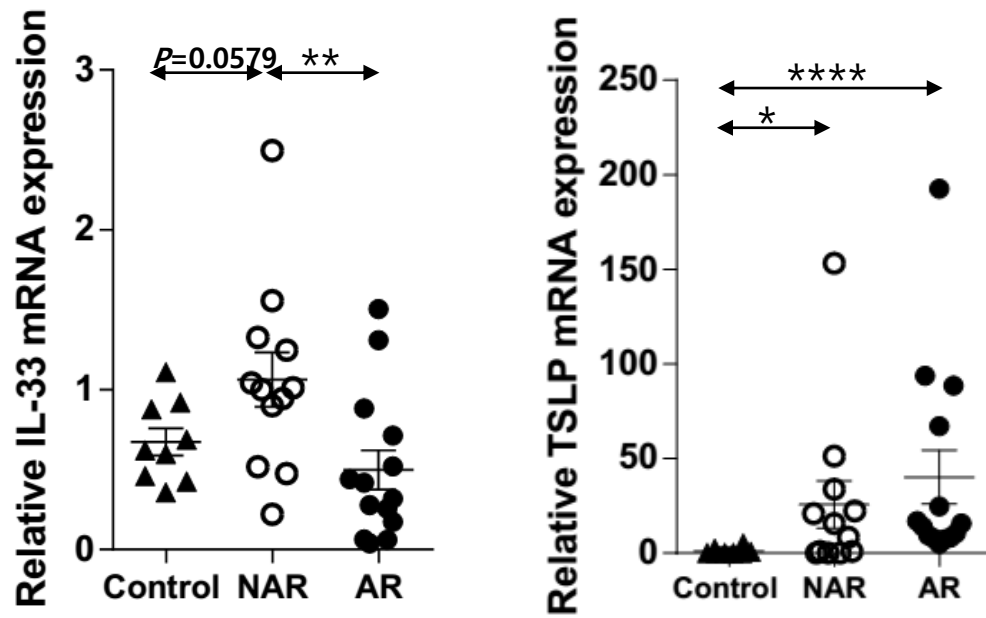

Supplement: f1 [file 3908049.f1.pdf]
